# Supplementary material
Source: Springer Nature journal article supplement (https://www.springermedizin.de/resource/supplementary/12877_2014_1048_MOESM10_ESM.pdf/9440702)
Supplement: MOESM10 [file 9440702]

Table 5. Multiple regression models for predicting SPBC (70)

---

Model 1

$$(1) Y_1 = - 50.959 + 2.450E-5 X_1 + 9.692 X_2 + 1.268 X_3 + 0.327 X_4 + En$$

$$R^2 = 0.422, \quad F\text{-Value} = 4.933, \quad P = 0.004$$

---

Model 2

$$(2) Y_2 = - 30.612 + 0.00001 X_1 + 1.984 X_2 + 0.586 X_3 + 0.412 X_4 + En$$

$$R^2 = 0.303, \quad F\text{-Value} = 2.939, \quad P = 0.039$$

---

Model 3

$$(3) Y_3 = - 89.981 + 0.00001 X_1 + 15.034 X_2 + 1.974 X_3 + 0.512 X_4 + En$$

$$R^2 = 0.439, \quad F\text{-Value} = 5.278, \quad P = 0.0031$$

---

Model 1, 2, 3:

: Economic level (+) Health expenditure (+) Using fixed and mobile telephone (+) Sanitation

$Y_1$  = SPBC (70) MF

$Y_2$  = SPBC (70) M

$Y_3$  = SPBC (70) F

$X_1$  = GNI

$X_2$  = PEHGDP

$X_3$  = FMST

$X_4$  = ISF

SPBC (70): Survival probability of becoming a centenarian for those aged 70 (per 10,000)

MF: Females and Males, M: Males, F: Females

GNI: Gross National Income per capita (constant 2005 international \$) (1990-2010)

PEHGDP: Public expenditure on health as a percentage of GDP (% of GDP) (2000-2010)

FMST: Fixed and mobile telephone subscribers (per 100 people) (1980-1990)

ISF: Proportion of the population using improved sanitation facilities (%), urban (2005-2010)
